# Supplementary material for: En route to a unified model for photo-electrochemical reactor optimisation. I - Photocurrent and H2 yield predictions
Source: Royal Society of Chemistry journal article supplement (doi:10.1039/c7ta05125e), 2017-01-01
Supplement: c7ta05125e1.pdf [file c7ta05125e1.pdf]

## Electronic Supplementary Information (ESI)

### ***En route* to a unified model for photo-electrochemical reactor optimisation. I - Photocurrent and H<sub>2</sub> yield predictions**

Franky E. Bedoya-Lora,<sup>\*a</sup> Anna Hankin<sup>a</sup> and Geoff H. Kelsall<sup>a</sup>

a. Department of Chemical Engineering, Imperial College London, London, SW7 2AZ, UK.

## Comparison of two models for efficiency of gas evolution

**Vogt model:** According to Vogt<sup>1</sup>, the efficiency of gas evolution,  $f_G$ , depends on the fractional surface coverage ( $\theta$ ), current density and concentration difference between the interface and bulk of the solution.

$$f_G = 1 + K_2 - [K_2(2 + K_2) + K_3^2]^{0.5}$$

$$K_2 = 1.53 \frac{DRT}{dP} \theta^{0.5} (1 - \theta^{0.5}) \Delta c \frac{nF}{j}$$

$$K_3 = k_{Ec'} (1 - \theta) \Delta c \frac{nF}{j}$$

The term  $K_2$  is related to the microconvection and  $K_3$  represents the fraction transferred by macroconvection, being  $k_{Ec'}$  the mass transfer coefficient due to macroconvection and estimated by the same author for oxygen ( $1 \times 10^{-5} \text{ m s}^{-1}$ ) and hydrogen ( $2 \times 10^{-5} \text{ m s}^{-1}$ ) gas evolution. Small variances in the efficiency of gas evolution are achieved when a surface coverage between 0.08 and 0.5 is used. Then, it is safe to assume a surface coverage of 0.1 for low current densities ( $10 - 100 \text{ A m}^{-2}$ ). The bubble size was assumed as  $d = 50 \mu\text{m}$ . The concentration of hydrogen and oxygen, at the interface of the cathode and anode respectively, was estimated from the figures reported by Shibata.<sup>2, 3</sup> Said experimental points were fitted to a 5 parameter logistic (5-PL) equation in order to obtain the concentration of oxygen or hydrogen as a function of the current density.

$$C_{o_2, H_2} = A + \frac{B - A}{\left(1 + \left(\frac{\log j_{a,c}}{C}\right)^D\right)^E}$$

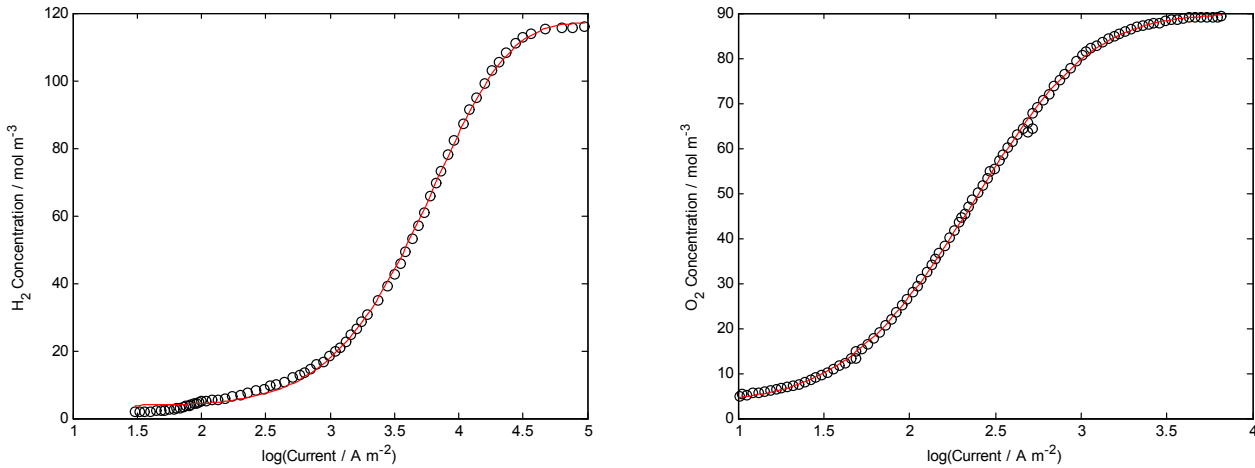

Figure S1.  $\text{H}_2$  and  $\text{O}_2$  concentration at cathode or anode/electrolyte interface vs current density and fitted data.

Table S1. Fitting coefficients for hydrogen and oxygen concentration as a function of current density.

| Constant | $\text{H}_2$ | $\text{O}_2$ |
|----------|--------------|--------------|
| A        | 117.98       | 89.859       |
| B        | 4.2617       | 3.7964       |
| C        | 7.9697       | 3.7662       |
| D        | 5.6489       | 5.0145       |
| E        | 303.50       | 7.6856       |

**Janssen model.** A simpler relationship for oxygen and hydrogen gas evolution in alkaline conditions is proposed by Janssen et al.<sup>4</sup> It is only a function of current density and ad-hoc parameters found after fitting to experimental data, see Table S5.

$$\frac{f_G}{1 - f_G} = a j^n$$

As it can be seen in Figure S2, both relationships are fairly similar. However, values estimated by Vogt fall into negatives values below current densities of ca.  $10 \text{ A m}^{-2}$ . This creates a discontinuity in the model which can be avoided if Janssen model is used. Both approaches were successfully used in the model presented to predict the behaviour of photo-electrochemical reactors. However, when using Vogt approach cumbersome restrictions must be applied and longer computing times were required.

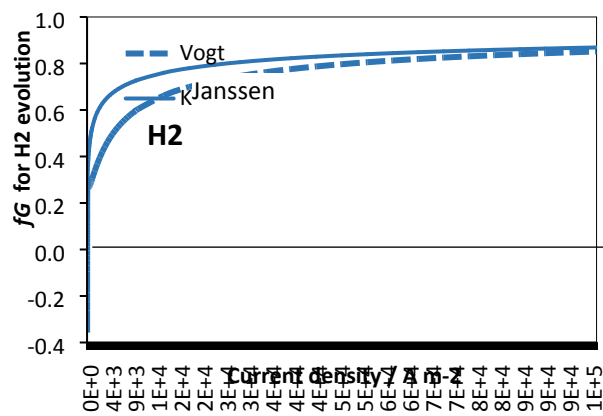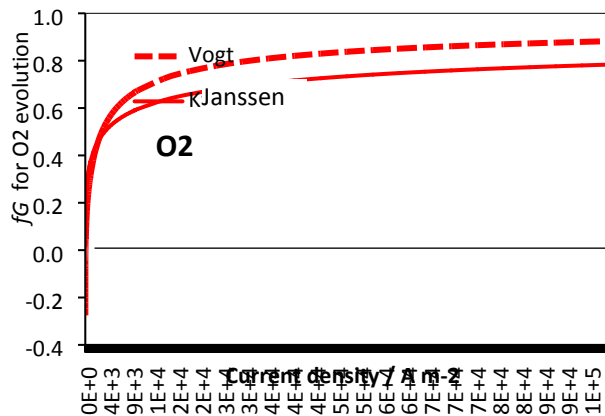

Figure S2. Efficiency of gas evolution for H<sub>2</sub> and O<sub>2</sub> estimated using Vogt (dashed) and Janssen et al. (continuous) relationships

## Volumetric mass transfer coefficient estimation for hydrogen and oxygen desorption in water

The volumetric absorption/desorption of gas in the liquid can be expressed in terms of the volumetric coefficient for liquid mass transfer:

$$\frac{dc_i}{dt} = N_{desorption} = K_L a (c_{sat,i} - c_i)$$

$K_L a$  is a function of the hydrodynamic properties of the fluid, diffusivity of the dissolved gas  $D_i$ , area of transfer per unit volume  $a$ , and characteristic length of the bubble, or in this case Sauter diameter  $d_B$ .  $K_L$  can be calculated using the Frossling correlation as a function of Re and Sc numbers and the bubble slip velocity,  $v_B$ , which can be estimated from Wüest relationship. The area of transfer per unit volume can be estimated using Deckwer correlation in terms of the gas hold up,  $\varepsilon_G$ , which can be estimated from Joshi and Sharma's correlation.

Table S2. Estimation of volumetric coefficient for liquid mass transfer

| Parameter                                                    | Symbol          | Correlation                                                   | Value                                   |                                         | Unit                           | Reference |
|--------------------------------------------------------------|-----------------|---------------------------------------------------------------|-----------------------------------------|-----------------------------------------|--------------------------------|-----------|
|                                                              |                 |                                                               | O <sub>2</sub>                          | H <sub>2</sub>                          |                                |           |
| Sauter diameter of bubble in saturated liquid                | $d_B$           |                                                               | $4.50 \times 10^{-4}$                   | $4.50 \times 10^{-4}$                   | m                              | 5         |
| Diffusion coefficient of gas in electrolyte                  | $D_i$           |                                                               | $1.59 \times 10^{-9}$                   | $3.00 \times 10^{-9}$                   | m <sup>2</sup> s <sup>-1</sup> | 4         |
| Kinematic viscosity of electrolyte (water at 25°C)           | $\nu$           |                                                               | $8.90 \times 10^{-7}$                   | $8.90 \times 10^{-7}$                   | m s <sup>-1</sup>              | IAPWS     |
| Bubble slip velocity (relative to liquid)                    | $v_B$           | $4474 \left( \frac{d_B}{2} \right)^{1.357} v_B$               | 0.0502                                  | 0.0502                                  | m s <sup>-1</sup>              | 6, 7      |
| Gas holdup                                                   | $\varepsilon_G$ | $\frac{v}{0.3 + 2v_B}$                                        | 0.125                                   | 0.125                                   | 1                              | 8, 9      |
| Schmidt number                                               | $Sc$            | $\frac{\nu}{D_i}$                                             | 559.7                                   | 296.7                                   | 1                              |           |
| Reynolds number                                              | $Re$            | $\frac{v_B d_B}{\nu}$                                         | 25.38                                   | 25.38                                   | 1                              |           |
| Mass transfer coefficient                                    | $k_L$           | $\frac{D_i}{d_B} (2 + 0.6 Re^{\frac{1}{2}} Sc^{\frac{1}{3}})$ | $9.51 \times 10^{-5}$                   | $1.48 \times 10^{-4}$                   | m s <sup>-1</sup>              | 10        |
| Area of transfer per unit volume                             | $a$             | $34.4 v_B^{0.25} \varepsilon_G$                               | 2.04                                    | 2.04                                    | m <sup>-1</sup>                | 8, 11     |
| Volumetric coefficient for liquid mass transfer              | $k_L a$         |                                                               | <b><math>1.94 \times 10^{-4}</math></b> | <b><math>3.02 \times 10^{-4}</math></b> | s <sup>-1</sup>                |           |
| Wüest correlation                                            |                 |                                                               |                                         |                                         |                                |           |
| Volumetric coefficient for liquid mass transfer              | $k_L a$         | $0.6 \frac{d_B}{2}$                                           | $2.76 \times 10^{-4}$                   | $2.76 \times 10^{-4}$                   | s <sup>-1</sup>                | 6, 7      |
| Deckwer correlation                                          |                 |                                                               |                                         |                                         |                                |           |
| Volumetric coefficient for liquid mass transfer (absorption) | $k_L a$         | $0.0086 (100 \times v_B)^{0.884}$                             | $3.58 \times 10^{-2}$                   | N/A                                     | s <sup>-1</sup>                | 12        |
| Volumetric coefficient for liquid mass transfer (desorption) | $k_L a$         | $0.0274 (100 \times v_B)^{0.8}$                               | $9.96 \times 10^{-2}$                   | N/A                                     | s <sup>-1</sup>                | 12        |

## Summary of properties and parameter fed into the model

Table S3. Experimentally measured characteristics of photo-anode Ti|Sn<sup>IV</sup>-Fe<sub>2</sub>O<sub>3</sub>

| Parameter                              | Symbol                                         | Value                                                                                   | Unit                                                              | Technique                                                            |
|----------------------------------------|------------------------------------------------|-----------------------------------------------------------------------------------------|-------------------------------------------------------------------|----------------------------------------------------------------------|
| Hematite film thickness                | $x$                                            | 4.7×10 <sup>-8</sup>                                                                    | m                                                                 | Profilometry                                                         |
| Band gap                               | $E_g$                                          | 2.11                                                                                    | eV                                                                | Tauc-plot                                                            |
| Absorptivity                           | $\alpha_\lambda = f(\lambda)$                  |                                                                                         | m <sup>-1</sup>                                                   | Absorbance UV-Vis region                                             |
| Relative permittivity                  | $\epsilon_r$                                   | 38.2                                                                                    | 1                                                                 | Photo current/PEIS analysis <sup>13</sup>                            |
| Donor density                          | $n_0$                                          | 1.92×10 <sup>25</sup>                                                                   | m <sup>-3</sup>                                                   | Mott-Schottky (Dark)                                                 |
| Charge transfer resistance             | $R_t = f(U_{applied})$                         |                                                                                         | $\Omega \text{ m}^{-2}$                                           | PEIS                                                                 |
| Surface recombination resistance       | $R_r = f(U_{applied})$                         |                                                                                         | $\Omega \text{ m}^{-2}$                                           | PEIS                                                                 |
| Flat band                              | Non-annealed<br>400 °C 60 min<br>500 °C 60 min | $U_{fb}$<br>0.711 vs. RHE<br>0.675 vs. RHE<br>0.725 vs. RHE                             | V<br>V<br>V                                                       | Squared photocurrent in 1M NaOH + 0.5M H <sub>2</sub> O <sub>2</sub> |
| Interfacial charge transfer efficiency | $\Phi_{surface} = f(A, B, \phi_{SC})$          |                                                                                         | 1                                                                 | Fitting of PEIS spectra                                              |
| Fitting parameter A                    | Non-annealed<br>400 °C 60 min<br>500 °C 60 min | A<br>2.547×10 <sup>-6</sup><br>1.059×10 <sup>-4</sup><br>1.079×10 <sup>-2</sup>         | 1<br>1<br>1                                                       |                                                                      |
| Fitting parameter B                    | Non-annealed<br>400 °C 60 min<br>500 °C 60 min | B<br>17.23<br>15.06<br>8.255                                                            | V <sup>-1</sup><br>V <sup>-1</sup><br>V <sup>-1</sup>             |                                                                      |
| Bulk recombination                     | Non-annealed<br>400 °C 60 min<br>500 °C 60 min | $\Phi_{bulk}$<br>0.1108<br>0.0888<br>0.0702                                             | 1<br>1<br>1                                                       | Squared photocurrent in 1M NaOH + 0.5M H <sub>2</sub> O <sub>2</sub> |
| Exchange current density               | Non-annealed<br>400 °C 60 min<br>500 °C 60 min | $j_{0,a}$<br>1.005×10 <sup>-3</sup><br>1.337×10 <sup>-3</sup><br>8.029×10 <sup>-3</sup> | A m <sup>-2</sup><br>A m <sup>-2</sup><br>A m <sup>-2</sup>       | Dark CV at 10 mV s <sup>-1</sup>                                     |
| Tafel slope                            | Non-annealed<br>400 °C 60 min<br>500 °C 60 min | $A_a$<br>0.175<br>0.224<br>0.454                                                        | V dec <sup>-1</sup><br>V dec <sup>-1</sup><br>V dec <sup>-1</sup> | Dark CV at 10 mV s <sup>-1</sup>                                     |

Table S4. Properties of set up and spectrally resolve absorbed photon flux

| Parameter                                         | Symbol                                         | Value                                                                                                                 | Unit                                                                                                  | Technique                                 |
|---------------------------------------------------|------------------------------------------------|-----------------------------------------------------------------------------------------------------------------------|-------------------------------------------------------------------------------------------------------|-------------------------------------------|
| Temperature                                       | $T$                                            | 298                                                                                                                   | K                                                                                                     | Thermometer                               |
| pH                                                | $pH$                                           | 13.6                                                                                                                  | 1                                                                                                     | pH-meter                                  |
| Photon flux                                       | $I_0$                                          | 6.02×10 <sup>21</sup>                                                                                                 | m <sup>-2</sup> s <sup>-1</sup>                                                                       | UV-Vis spectrophotometer                  |
| Absorbed photon flux                              | Non-annealed<br>400 °C 60 min<br>500 °C 60 min | $\Sigma(I_0 - I_x)_\lambda$<br>2.97×10 <sup>21</sup><br>2.91×10 <sup>21</sup><br>3.11×10 <sup>21</sup>                | m <sup>-2</sup> s <sup>-1</sup><br>m <sup>-2</sup> s <sup>-1</sup><br>m <sup>-2</sup> s <sup>-1</sup> | Integration of absorbance and photon flux |
| Absorbed photon flux times absorption coefficient | Non-annealed<br>400 °C 60 min<br>500 °C 60 min | $\Sigma(I_0 - I_x)_\lambda \alpha_\lambda$<br>1.71×10 <sup>29</sup><br>1.70×10 <sup>29</sup><br>1.72×10 <sup>29</sup> | m <sup>-3</sup> s <sup>-1</sup><br>m <sup>-3</sup> s <sup>-1</sup><br>m <sup>-3</sup> s <sup>-1</sup> | Integration of absorbance and photon flux |
| Power intensity                                   | $P_0$                                          | 3646                                                                                                                  | W m <sup>-2</sup>                                                                                     | UV-Vis spectrophotometer                  |
| Conductivity of electrolyte (1M NaOH)             | $\sigma_{e,a}$ and $\sigma_{e,c}$              | 20.6                                                                                                                  | S m <sup>-1</sup>                                                                                     | Conductivity Meter                        |
| Membrane thickness                                | $l_m$                                          | 3.30×10 <sup>-4</sup>                                                                                                 | m                                                                                                     | Taken from supplier                       |

Table S5. Summary of parameter taken from literature or calculated from thermodynamic data

| Parameter                                                                       | Symbol                    | Value                    | Unit                                | Reference |
|---------------------------------------------------------------------------------|---------------------------|--------------------------|-------------------------------------|-----------|
| Elementary charge                                                               | $e$                       | $1.6022 \times 10^{-19}$ | C                                   |           |
| Boltzmann constant                                                              | $k_B$                     | $1.3806 \times 10^{-23}$ | J K <sup>-1</sup>                   |           |
| Vacuum permittivity                                                             | $\epsilon_0$              | $8.85 \times 10^{-12}$   | F m <sup>-1</sup>                   |           |
| Speed of light                                                                  | $c$                       | $3.00 \times 10^8$       | m s <sup>-1</sup>                   |           |
| Planck constant                                                                 | $h$                       | $6.626 \times 10^{-34}$  | J s                                 |           |
| Faraday constant                                                                | $F$                       | 96484.6                  | C mol <sup>-1</sup>                 |           |
| Gas constant                                                                    | $R$                       | 8.31445                  | J mol <sup>-1</sup> K <sup>-1</sup> |           |
| Reversible potential of O <sub>2</sub> evolution (OER, pH 13.6)                 | $U_{O_2 H_2O}$            | 1.229                    | V vs. RHE                           |           |
| Reversible potential of H <sub>2</sub> evolution (HER, pH 13.6)                 | $U_{H_2O H_2}$            | 0                        | V vs. RHE                           |           |
| Number of electrons transferred for O <sub>2</sub> evolution (OER)              | $n_{O_2}$                 | 4                        | 1                                   |           |
| Number of electrons transferred for H <sub>2</sub> evolution (HER)              | $n_{H_2}$                 | 2                        | 1                                   |           |
| Exchange current density cathode (Pt)                                           | $j_{0,c}$                 | 6.9                      | A m <sup>-2</sup>                   | 14        |
| Transfer coefficient for oxidation (Pt)                                         | $\alpha_{ox,c}$           | 0.5                      | 1                                   | 14        |
| Transfer coefficient for reduction (Pt)                                         | $\alpha_{red,c}$          | 0.5                      | 1                                   | 14        |
| Conductivity of substrate (Ti)                                                  | $\sigma_a$ and $\sigma_c$ | $1.8 \times 10^6$        | S m <sup>-1</sup>                   | 15        |
| Conductivity of membrane (Nafion® 117)                                          | $\sigma_m$                | 10                       | S m <sup>-1</sup>                   | 16        |
| Diffusion coefficient of O <sub>2</sub> in membrane (Nafion® 117)               | $D_{O_2,m}$               | $6.2 \times 10^{-11}$    | m <sup>2</sup> s <sup>-1</sup>      | 17        |
| Diffusion coefficient of H <sub>2</sub> in membrane (Nafion® 125)               | $D_{H_2,m}$               | $8.02 \times 10^{-11}$   | m <sup>2</sup> s <sup>-1</sup>      | 18        |
| Saturation concentration of O <sub>2</sub> in membrane (Nafion® 117)            | $c_{O_2,sat,m}$           | 18.7                     | mol m <sup>-3</sup>                 | 17        |
| Saturation concentration of H <sub>2</sub> in membrane (Nafion® 125)            | $c_{H_2,sat,m}$           | 7.5                      | mol m <sup>-3</sup>                 | 18        |
| Partition coefficient of O <sub>2</sub> membrane   electrolyte                  | $K_{O_2,m}$               | 21.01                    | 1                                   | 4, 17, 18 |
| Partition coefficient of H <sub>2</sub> membrane   electrolyte                  | $K_{H_2,m}$               | 14.42                    | 1                                   | 4, 17, 18 |
| Diffusion coefficient of O <sub>2</sub> in electrolyte (1M KOH)                 | $D_{O_2}$                 | $1.59 \times 10^{-9}$    | m <sup>2</sup> s <sup>-1</sup>      | 4         |
| Diffusion coefficient of H <sub>2</sub> in electrolyte (1M KOH)                 | $D_{H_2}$                 | $3.0 \times 10^{-9}$     | m <sup>2</sup> s <sup>-1</sup>      | 4         |
| Saturation concentration of O <sub>2</sub> in electrolyte (1M KOH)              | $c_{O_2,sat}$             | 0.89                     | mol m <sup>-3</sup>                 | 4         |
| Saturation concentration of H <sub>2</sub> in electrolyte (1M KOH)              | $c_{H_2,sat}$             | 0.52                     | mol m <sup>-3</sup>                 | 4         |
| Volumetric mass transfer coefficient of O <sub>2</sub> (water)                  | $k_L a_{O_2}$             | $1.94 \times 10^{-4}$    | s <sup>-1</sup>                     | 5, 8, 10  |
| Volumetric mass transfer coefficient of H <sub>2</sub> (water)                  | $k_L a_{H_2}$             | $3.02 \times 10^{-4}$    | s <sup>-1</sup>                     | 5, 8, 10  |
| Diffusion coefficient of OH <sup>-</sup> in electrolyte (0.26M NaOH)            | $D_{OH^-}$                | $4.56 \times 10^{-9}$    | m <sup>2</sup> s <sup>-1</sup>      | 19        |
| Proportionality factor of power law of O <sub>2</sub> bubble evolution (1M KOH) | $a_{G,O_2}$               | 0.6                      | 1                                   | 4         |
| Exponent of power law of O <sub>2</sub> bubble evolution (1M KOH)               | $n_{G,O_2}$               | 0.39                     | 1                                   | 4         |
| Proportionality factor of power law of H <sub>2</sub> bubble evolution (1M KOH) | $a_{G,H_2}$               | 1.1                      | 1                                   | 4         |
| Exponent of power law of H <sub>2</sub> bubble evolution (1M KOH)               | $n_{G,H_2}$               | 0.39                     | 1                                   | 4         |

Donor density and flat band potential determination using Mott-Schottky

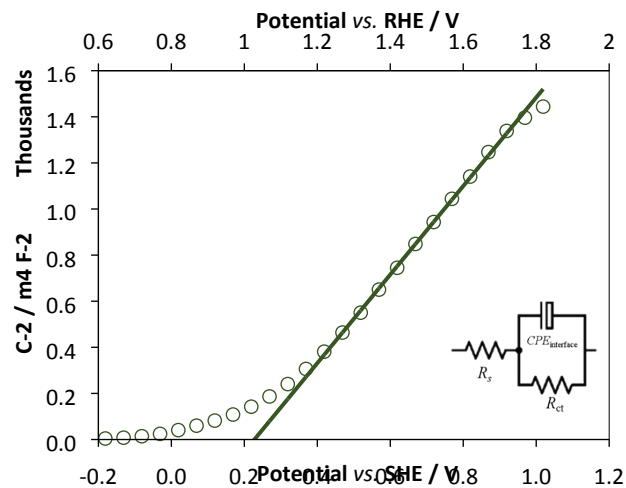

Figure S3. Mott-Schottky plots on Ti|Sn<sup>IV</sup>-doped α-Fe<sub>2</sub>O<sub>3</sub> in 1M NaOH after annealing at 500 ° temperatures. Inset shows the equivalent electrical circuit used to fit the impedance spectra.

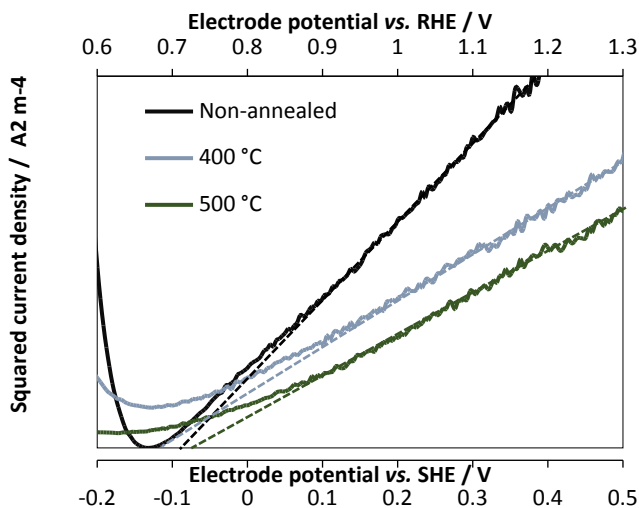

Figure S4. Squared photocurrent (evaluated by subtracting the dark current from the current measured under illumination) of Ti|Sn<sup>IV</sup>-doped α-Fe<sub>2</sub>O<sub>3</sub> after different temperature of annealing in presence of 0.5M H<sub>2</sub>O<sub>2</sub> and 3000 W m<sup>-2</sup> Xe arc lamp.

Table S6. Effects of annealing temperature and time on flat band potential vs. RHE (V) for Ti|Sn<sup>IV</sup>-doped α-Fe<sub>2</sub>O<sub>3</sub> | 1 M NaOH estimated by different methods.

| Sample      | OCPD (photo) / V |                                                | $j_{ph}^2 / A^2 m^{-4}$ |
|-------------|------------------|------------------------------------------------|-------------------------|
|             | 1 M NaOH         | 1 M NaOH + 0.5 M H <sub>2</sub> O <sub>2</sub> |                         |
| Un-annealed | 0.71             | 0.68                                           | 0.71                    |
| 400°C 60min | 0.67             | 0.65                                           | 0.66                    |
| 500°C 60min | 0.73             | 0.67                                           | 0.72                    |

## Absorbed photon flux determination

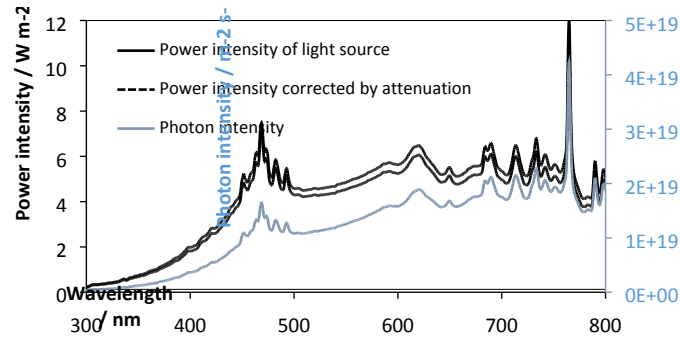

Figure S5. Power intensity before and after correction by electrolyte and quartz window attenuation of the 3600 W m<sup>-2</sup> Xe arc lamp. Photon flux in the right axis.

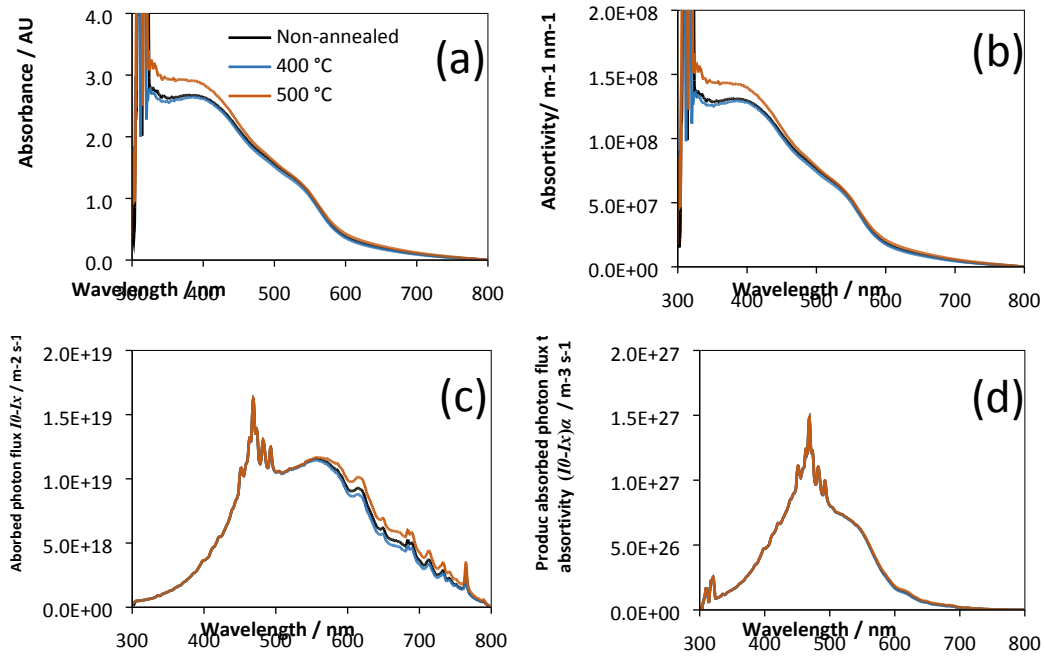

Figure S6. Optical properties of FTO|Sn<sup>IV</sup>-doped  $\alpha$ -Fe<sub>2</sub>O<sub>3</sub> non-annealed, 400 °C and 500 °C annealing corrected by attenuation by electrolyte and quartz window. (a) absorbance spectra, (b) absorptivity, (c) absorbed photon flux and (d) product of photon flux and absorptivity.

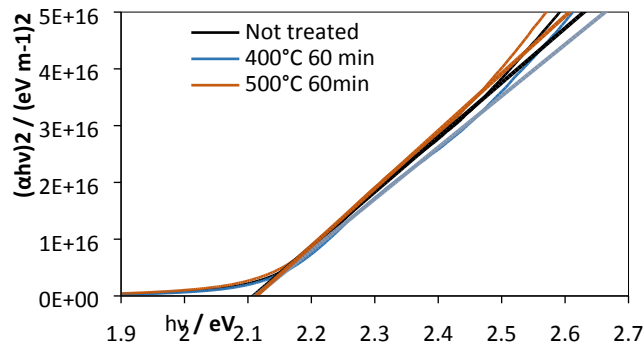

Figure S7. Tauc plot for direct band gap of Sn<sup>IV</sup>-doped  $\alpha$ -Fe<sub>2</sub>O<sub>3</sub> on FTO: non-annealed, 400 °C and 500 °C annealing. Hematite film thickness was 47nm.



# Estimation of electron-hole recombination in bulk from photo-current in presence and absence of hole scavenger

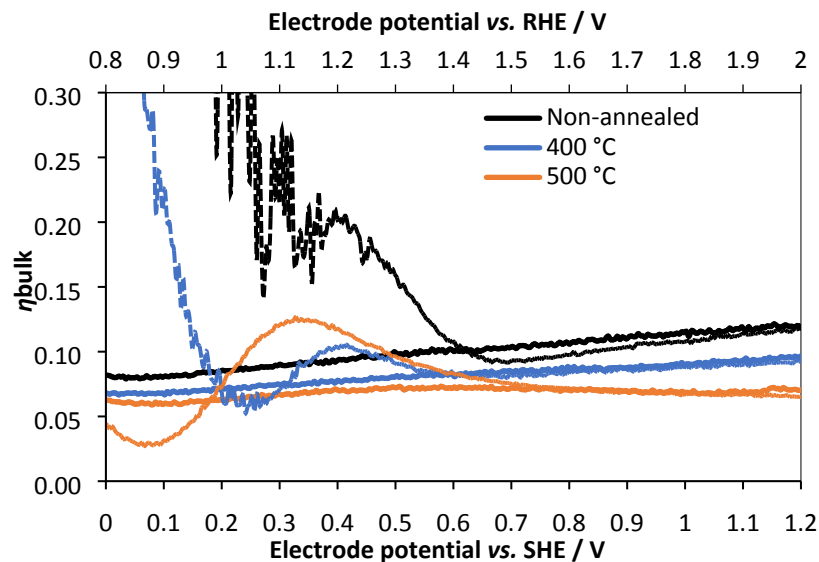

Figure S8. Bulk efficiency estimation using photoresponse and eqn (10) in presence (continuous lines) and absence (dashed lines) of a hole-scavenger. The deviation at low potentials is due to very low currents densities measured in absence of hole scavenger. Photocurrent densities in 1 M NaOH were corrected only for surface recombination rates: dividing the photocurrent density by  $\Phi_{surface}$  as a function of potential.

Table S7. Comparison of electron-hole recombination efficiencies in bulk photo-anode calculated from photo-response in presence and absence of hole scavenger as an average between 1.4 and 2.0 V vs. RHE.

| Sample                                                                           | $\Phi_{bulk}$                                |         |
|----------------------------------------------------------------------------------|----------------------------------------------|---------|
|                                                                                  | 1M NaOH + 0.5M H <sub>2</sub> O <sub>2</sub> | 1M NaOH |
| Ti Sn <sup>IV</sup> -doped $\alpha$ -Fe <sub>2</sub> O <sub>3</sub> non-annealed | 0.1107                                       | 0.1044  |
| Ti Sn <sup>IV</sup> -doped $\alpha$ -Fe <sub>2</sub> O <sub>3</sub> 400 °C       | 0.0888                                       | 0.0862  |
| Ti Sn <sup>IV</sup> -doped $\alpha$ -Fe <sub>2</sub> O <sub>3</sub> 500 °C       | 0.0702                                       | 0.0703  |

Efficiency of gas evolution ( $f_G$ ) and gas desorption rate with the current density at the cathode and anode.

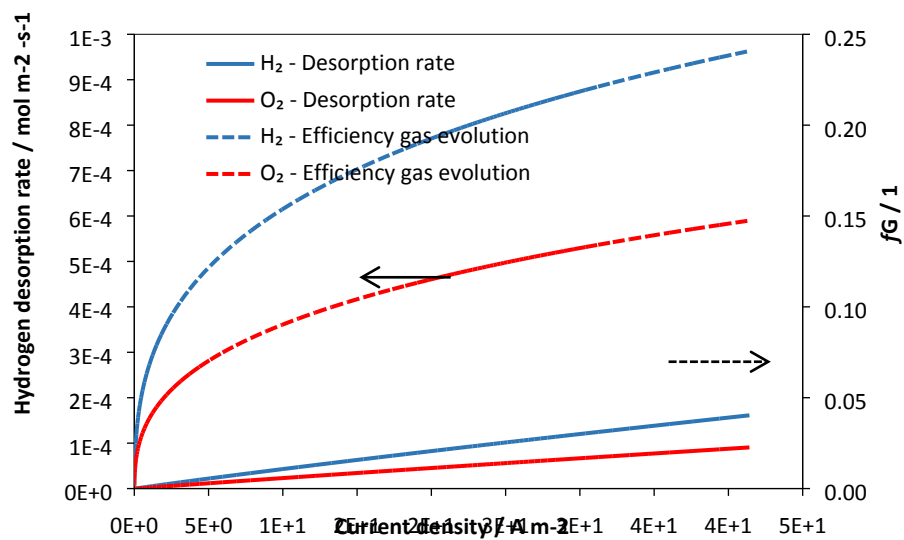

Figure S9. Dependence of efficiency of gas evolution  $f_G$  and gas desorption rate on current density at the cathode and photo-anode for hydrogen and oxygen evolution, respectively.

## Properties of a hypothetical enhanced photo-anode

Table S8. Characterisation of hypothetical photo-anode

| Parameter                              | Symbol                                | Value                  | Unit                |
|----------------------------------------|---------------------------------------|------------------------|---------------------|
| Film thickness                         | $x$                                   | $4.7 \times 10^{-8}$   | m                   |
| Band gap                               | $E_g$                                 | 1.7                    | eV                  |
| Absorptivity                           | $\alpha$                              | 729                    | nm                  |
| Relative permittivity                  | $\epsilon_r$                          | $1.47 \times 10^8$     | $\text{m}^{-1}$     |
| Donor density                          | $n_0$                                 | 40                     | 1                   |
| Flat band                              | $U_{fb}$                              | $1 \times 10^{25}$     | $\text{m}^{-3}$     |
| Interfacial charge transfer efficiency | $\Phi_{surface} = f(A, B, \phi_{SC})$ | 0.1 vs. RHE            | V                   |
| Fitting parameter A                    | A                                     | 1                      |                     |
| Fitting parameter B                    | B                                     | $1.059 \times 10^{-4}$ | 1                   |
| Bulk recombination                     | $\Phi_{bulk}$                         | 15.06                  | $\text{V}^{-1}$     |
| Exchange current                       | $j_{0,a}$                             | 0.5                    | 1                   |
| Tafel slope                            | $A_a$                                 | $1.005 \times 10^{-3}$ | $\text{A m}^{-2}$   |
|                                        |                                       | 0.175                  | $\text{V dec}^{-1}$ |

Table S9. Properties of set up and absorbed photon flux for an enhanced photo-electrode

| Parameter                                         | Symbol                                   | Value                 | Unit                          | Comments           |
|---------------------------------------------------|------------------------------------------|-----------------------|-------------------------------|--------------------|
| Temperature                                       | $T$                                      | 298                   | K                             |                    |
| pH                                                | $pH$                                     | 13.6                  | 1                             |                    |
| Photon flux                                       | $I_0$                                    | $4.00 \times 10^{21}$ | $\text{m}^{-2} \text{s}^{-1}$ | Solar 1.5AM Direct |
| Absorbed photon flux                              | $\sum(I_0 - I_x)_\lambda$                | $1.21 \times 10^{21}$ | $\text{m}^{-2} \text{s}^{-1}$ |                    |
| Absorbed photon flux times absorption coefficient | $\sum(I_0 - I_x)_\lambda \alpha_\lambda$ | $1.78 \times 10^{29}$ | $\text{m}^{-3} \text{s}^{-1}$ |                    |
| Power intensity                                   | $P_0$                                    | 900                   | $\text{W m}^{-2}$             | Solar 1.5AM Direct |
| Conductivity of electrolyte (1 M NaOH)            | $\sigma_a$ and $\sigma_c$                | 20.6                  | $\text{S m}^{-1}$             |                    |

**Fraction of hydrogen originated from desorption and gas evolution at the surface of the cathode.**

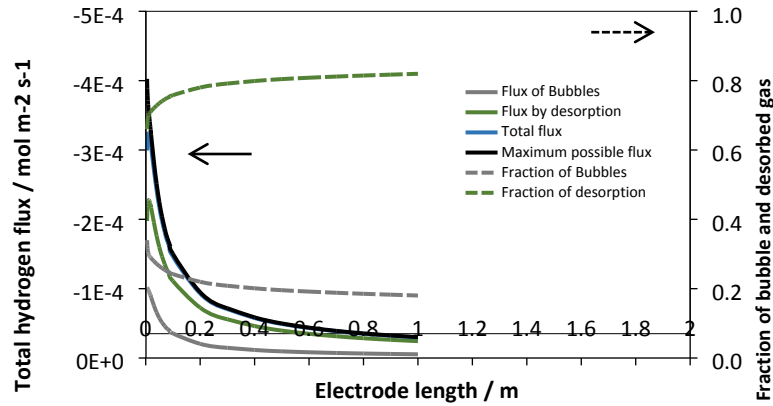

Figure S10. Hydrogen flux due to bubbles at the electrode and desorption under supersaturated conditions (left axis), values are negative as they leave the control volume (electrolyte). Fraction of bubble and desorption rates in the catholyte (right axis) for an enhanced electrode operating at an applied electrode potential of 1 V vs. RHE.

Different definitions of efficiency were plotted in Figure S11. STH and ASTH follow the same trend as hydrogen yield. The difference between them is related to the electrical bias, which is accounted in the definition of ASTH efficiency.

$$STH = \left[ \frac{E_{H_2} N_{H_2}}{P^o} \right]_{AM\ 1.5G}$$

$$ASTH = \frac{E_{H_2} N_{H_2}}{(P^o + j_{ph} \Delta U_{bias})}$$

ABPE and AB-STH are more widely used definitions to compare systems under applied electrical bias in terms of the obtained current and not the hydrogen yield. The only difference between the two is that AB-STH accounts for faradaic efficiency effects, which, in the present case of study, is better replaced by cross-over efficiency. Cross-over efficiency, as defined in the main manuscript, accounts for combined faradaic and cross-over losses. It can be seen how there is a compromise between the cross-over efficiency and the total current density obtained from the system, resulting in a maximum at 0.02 m. This length is longer than the maximum obtained with ASTH, ca. 0.01 m, and it is related to the way ASTH accounts for electrical bias (denominator) compared to AB-STH (numerator). It is worth noticing that the total electrical bias applied to the system decreases with the length electrode, from 1.11 to 1.005 V.

$$ABPE = \left[ \frac{j_{ph}(E^0 - |\Delta U_{bias}|)}{P^o} \right]_{AM\ 1.5}$$

$$AB - STH = \frac{j_{ph} \times \varepsilon_{H_2} \times (E^0 - \Delta U_{bias})}{P^o}$$

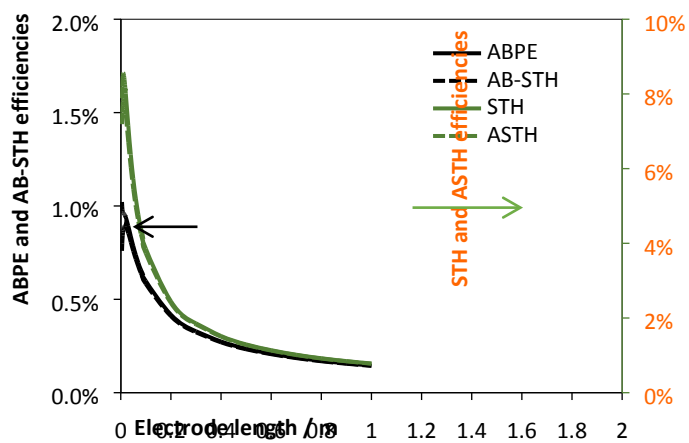

Figure S11. Comparison of the effect of electrode length on different solar-to-hydrogen efficiencies estimated for the enhanced photo-anode operating at 1 V vs. RHE.

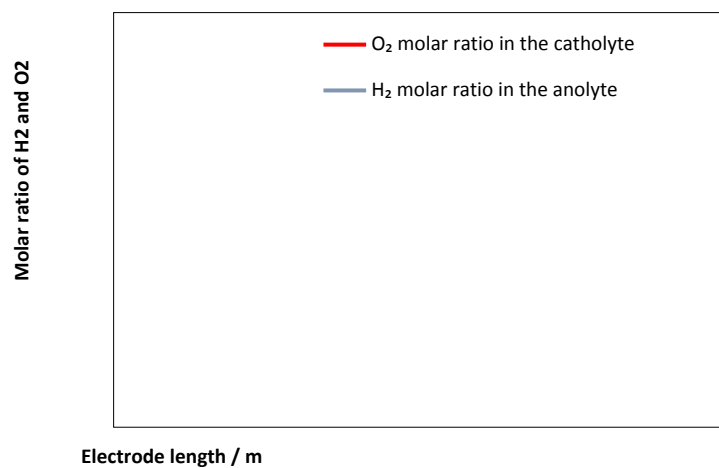

Figure S12. Effect of electrode length on molar fractions of H<sub>2</sub> and O<sub>2</sub> collected in the anolyte and catholyte compartments, respectively; values estimated for the enhanced photo-anode operating at 1 V vs. RHE.

### Convergence and mesh study

The modelling was performed in COMSOL Multiphysics 5.2a with a Batteries and Fuel Cells module using an Intel® Core™ i7-6700 CPU @ 3.40 GHz processor with 40.0 GB RAM and a 64-bit operating system.

#### Convergence study

1-D model, anode potential: 1.6 V vs. RHE

| Tolerance    | Solution time / s | Dark current / A m <sup>-2</sup> | Photocurrent / A m <sup>-2</sup> | Hydrogen flux / mol m <sup>-2</sup> s <sup>-1</sup> |
|--------------|-------------------|----------------------------------|----------------------------------|-----------------------------------------------------|
| 0.1          | 1                 | 0.131                            | 20.769                           | $1.0791 \times 10^{-4}$                             |
| 0.01         | 1                 | 0.131                            | 20.769                           | $1.0791 \times 10^{-4}$                             |
| <b>0.001</b> | <b>1</b>          | <b>0.131</b>                     | <b>20.769</b>                    | <b><math>1.0789 \times 10^{-4}</math></b>           |
| 0.0001       | 1                 | 0.131                            | 20.769                           | $1.0789 \times 10^{-4}$                             |

2-D model, anode potential = 1.6 V vs. RHE, electrode length = 0.1 m

| Tolerance    | Solution time / s | Dark current / A m <sup>-2</sup> | Photocurrent / A m <sup>-2</sup> | Hydrogen flux / mol m <sup>-2</sup> s <sup>-1</sup> |
|--------------|-------------------|----------------------------------|----------------------------------|-----------------------------------------------------|
| 0.1          | 60                | 1.0585                           | 65.048                           | $3.3968 \times 10^{-4}$                             |
| 0.01         | 62                | 1.0002                           | 65.667                           | $3.3241 \times 10^{-4}$                             |
| <b>0.001</b> | <b>62</b>         | <b>1.0002</b>                    | <b>65.667</b>                    | <b><math>3.3241 \times 10^{-4}</math></b>           |
| 0.0001       | 63                | 0.99839                          | 65.676                           | $3.3229 \times 10^{-4}$                             |
| 0.00001      | 63                | 0.99839                          | 65.676                           | $3.3229 \times 10^{-4}$                             |

#### Mesh study

1-D model, anode potential: 1.6 V vs. RHE

| Domain elements | Solution time / s | Dark current / A m <sup>-2</sup> | Photocurrent / A m <sup>-2</sup> | Hydrogen flux / mol m <sup>-2</sup> s <sup>-1</sup> |
|-----------------|-------------------|----------------------------------|----------------------------------|-----------------------------------------------------|
| 23              | 0.1               | 0.131                            | 20.769                           | $1.0789 \times 10^{-4}$                             |
| <b>102</b>      | <b>1</b>          | <b>0.131</b>                     | <b>20.769</b>                    | <b><math>1.0789 \times 10^{-4}</math></b>           |
| 1001            | 1                 | 0.131                            | 20.769                           | $1.0789 \times 10^{-4}$                             |

2-D model, anode potential = 1.6 V vs. RHE, electrode length = 0.1 m

| Domain elements | Solution time / s | Dark current / A m <sup>-2</sup> | Photocurrent / A m <sup>-2</sup> | Hydrogen flux / mol m <sup>-2</sup> s <sup>-1</sup> |
|-----------------|-------------------|----------------------------------|----------------------------------|-----------------------------------------------------|
| 7882            | 8                 | 1.1684                           | 66.043                           | $3.3273 \times 10^{-4}$                             |
| 26799           | 18                | 1.0517                           | 65.771                           | $3.3225 \times 10^{-4}$                             |
| <b>69530</b>    | <b>62</b>         | <b>1.0002</b>                    | <b>65.667</b>                    | <b><math>3.3241 \times 10^{-4}</math></b>           |
| 115305          | 87                | 0.97021                          | 65.607                           | $3.3224 \times 10^{-4}$                             |
| 153344          | 119               | 0.96718                          | 65.592                           | $3.3220 \times 10^{-4}$                             |
| 210500          | 193               | 0.95232                          | 65.580                           | $3.3241 \times 10^{-4}$                             |

### Derivation of modified Gartner-Butler equation

The derivation of the modified Gartner-Butler equation was explained in more detailed previously.<sup>13</sup> The nomenclature and symbols of the original references were also updated in here.

According to Butler,<sup>20</sup> the generated electron-hole pairs are a function of incident photons and absorptivity coefficient of the material:

$$G(x) = I_0 \alpha \exp(-\alpha x)$$

Where  $x$  is the depth from the surface | electrolyte interface.

The total photocurrent generated due to the absorption of photons in the semiconductor was derived by Gärtner<sup>21</sup>:

$$j_{ph} = eI_0 \left[ 1 - \frac{\exp(-\alpha d_{sc})}{(1 + \alpha L_p)} \right] + \frac{ep_0 D_p}{L_p}$$

The first term on the right is associated with the photocurrent due to electron-hole pairs generated in the depletion layer width,  $d_{sc}$ . The second term involves the photocurrent generated by diffusion of holes into the bulk of the semiconductor. In this case, the absorptivity coefficient is a function of wavelength,  $\lambda$ , so the photocurrent densities generated will also be a function of  $\lambda$  and the total photocurrent density can be obtained by integration over the wavelength range of the light source.

Later, Butler assumed that for semiconductors with a wide bandgap, e.g.  $\text{TiO}_2$  and  $\text{WO}_3$ , the contribution of the second term due to diffusion can be disregarded. This assumption can also be extended to hematite. Also, if the diffusion length,  $L_p$ , is small compared to the absorption depth,  $\alpha^{-1}$ , i.e.  $\alpha L_p \ll 1$ , then expected photocurrent densities can be simplified to:

$$j_{ph} = eI_0 [1 - \exp(-\alpha d_{sc})]$$

This equation is similar to that proposed initially,  $G(x) = I_0 \alpha \exp(-\alpha x)$ , and can be obtained after integration of the generation rate of electron-hole pairs from the electrode | electrolyte interface,  $x = 0$ , to the depletion layer depth,  $x = d_{sc}$ .

$$j_{ph} = e \int_0^{d_{sc}} G(x) dx$$

$$j_{ph} = -eI_0 [\exp(-\alpha d_{sc}) - 1]$$

The thickness of depletion region is given by:<sup>22</sup>

$$d_{sc} = 2L_{D,eff} \left[ \frac{e\Delta\phi_{sc}}{k_B T} - 1 \right]^{0.5}$$

Where  $L_{D,eff}$  is the effective diffusion length:

$$L_{D,eff} = \left( \frac{\epsilon_0 \epsilon_r k_B T}{2 n_0 e^2} \right)^{0.5}$$

Replacing  $d_{sc}$  and  $L_{D,eff}$ , and expanding the exponential term under the assumption that the value inside is much less than one, i.e.  $\alpha d_{sc} \ll 1$ , then the following equation is obtained:

$$j_{ph(GB)} = \left( \frac{2e I_0^2 \alpha^2 \epsilon_0 \epsilon_r}{n_0} \right)^{\frac{1}{2}} (\Delta \phi_{sc})^{\frac{1}{2}}$$

Also, assuming that the band bending in the semiconductor can be expressed as the difference between the applied potential and the flat band, and expressing the photon flux and absorptivity as functions of wavelength:

$$j_{ph(GB)} = \left( \frac{2e \left( \sum_{\lambda} I_{0,\lambda} \alpha_{\lambda} \right)^2 \epsilon_0 \epsilon_r}{n_0} \right)^{\frac{1}{2}} (U_{applied} - U_{FB})^{\frac{1}{2}}$$

The photocurrent predicted by the modified Gärtner–Butler equation does not account for electron-hole recombination losses in the bulk of the semiconductor and in the electrode | electrolyte interface.



## References

1. H. Vogt, *Electrochimica Acta*, 1984, **29**, 167-173.
2. S. Shibata, *Bulletin of The Chemical Society of Japan*, 1963, **36**, 53-57.
3. S. Shibata, *Electrochimica Acta*, 1978, **23**, 619-623.
4. J. M. Chin Kwie Joe, L. J. J. Janssen, S. J. D. van Strelen, J. H. G. Verbunt and W. M. Sluyter, *Electrochimica Acta*, 1988, **33**, 769-779.
5. G. Marrucci and L. Nicodemo, *Chemical Engineering Science*, 1967, **22**, 1257-1265.
6. D. F. McGinnis and J. C. Little, *Water Research*, 2002, **36**, 4627-4635.
7. A. Wüest, N. H. Brooks and D. M. Imboden, *Water Resources Research*, 1992, **28**, 3235-3250.
8. P. Painmanakul, J. Wachirasak, M. Jamnongwong and G. Hebrard, *Engineering Journal*, 2009, **13**, 16.
9. J. B. Joshi and M. M. Sharma, *Transactions of the Institute of Chemical Engineers*, 1979, **57**, 244-251.
10. N. Frossling, *Gerlands Beitrage zur Geophysik*, 1938, **52**, 107-216.
11. W. D. Deckwer, *Bubble Column Reactions*, John Wiley, Chichester, 1992.
12. W. D. Deckwer, R. Burckhart and G. Zoll, *Chemical Engineering Science*, 1974, **29**, 2177-2188.
13. A. Hankin, F. E. Bedoya-Lora, C. K. Ong, J. C. Alexander, F. Petter and G. H. Kelsall, *Energy & Environmental Science*, 2017, **10**, 346-360.
14. W. Sheng, H. A. Gasteiger and Y. Shao-Horn, *Journal of The Electrochemical Society*, 2010, **157**, B1529-B1536.
15. R. W. Powell and R. P. Tye, *Journal of the Less Common Metals*, 1961, **3**, 226-233.
16. Y. Sone, P. Ekdunge and D. Simonsson, *Journal of The Electrochemical Society*, 1996, **143**, 1254-1259.
17. A. T. Haug and R. E. White, *Journal of The Electrochemical Society*, 2000, **147**, 980-983.
18. Z. Ogumi, T. Kuroe and Z. i. Takehara, *Journal of The Electrochemical Society*, 1985, **132**, 2601-2605.
19. S. H. Lee, *Bull. Korean Chem. Soc.*, 2013, **34**, 2925-2930.
20. M. A. Butler, *Journal of Applied Physics*, 1977, **48**, 1914-1920.
21. W. W. Gärtner, *Physical Review*, 1959, **116**, 84-87.
22. R. Memming, in *Comprehensive Treatise of Electrochemistry*, eds. B. E. Conway, J. O. M. Bockris, E. Yeager, S. U. M. Khan and R. E. White, Springer, US, 1983, vol. Volume 7: Kinetics and Mechanisms of Electrode Processes, pp. 529 – 592
